# Supplementary material
Source: PubMed Central journal article supplement (PMC2917910)
Supplement: NIHMS211405-supplement-1_si_001.pdf [file NIHMS211405-supplement-1_si_001.pdf]

## Supporting Information

### Relationships Between Polybrominated Diphenyl Ether Concentrations in House Dust and Serum

Paula I. Johnson, Heather M. Stapleton, Andreas Sjodin, John D. Meeker

No. of pages: 3

No. of Tables: 3

S1

Table S1. Spearman correlation coefficients for PBDE concentrations in dust (n = 50)

|             |         | BDE 17  | BDE 28/33 | BDE 75 | BDE 49  | BDE47   | BDE66   | BDE99   | BDE100  | BDE85/155 | BDE154  | BDE153  | BDE138  | BDE183  | BDE202  | BDE201  | BDE200/203 | BDE208  | BDE207  | BDE206  | BDE209  |
|-------------|---------|---------|-----------|--------|---------|---------|---------|---------|---------|-----------|---------|---------|---------|---------|---------|---------|------------|---------|---------|---------|---------|
| BDE 17      | r       | 1.00    | 0.85      | 0.38   | 0.76    | 0.85    | 0.79    | 0.76    | 0.75    | 0.70      | 0.63    | 0.65    | 0.51    | 0.28    | 0.06    | 0.14    | -0.04      | -0.05   | -0.05   | -0.07   | -0.08   |
|             | p-value |         | <0.0001   | 0.007  | <0.0001 | <0.0001 | <0.0001 | <0.0001 | <0.0001 | <0.0001   | <0.0001 | <0.0001 | 0.0002  | 0.05    | 0.70    | 0.35    | 0.80       | 0.74    | 0.72    | 0.65    | 0.60    |
| BDE 28/33   | r       | 0.85    | 1.00      | 0.40   | 0.73    | 0.86    | 0.81    | 0.73    | 0.76    | 0.68      | 0.65    | 0.64    | 0.50    | 0.32    | 0.00    | 0.16    | -0.16      | -0.09   | -0.09   | -0.07   | -0.08   |
|             | p-value | <0.0001 |           | 0.004  | <0.0001 | <0.0001 | <0.0001 | <0.0001 | <0.0001 | <0.0001   | <0.0001 | <0.0001 | 0.0002  | 0.02    | 1.00    | 0.27    | 0.28       | 0.51    | 0.56    | 0.61    | 0.57    |
| BDE 75      | r       | 0.38    | 0.40      | 1.00   | 0.29    | 0.38    | 0.36    | 0.27    | 0.24    | 0.26      | 0.21    | 0.27    | 0.29    | 0.25    | 0.03    | 0.22    | 0.07       | -0.14   | -0.13   | -0.18   | -0.11   |
|             | p-value | 0.007   | 0.004     |        | 0.04    | 0.006   | 0.01    | 0.06    | 0.09    | 0.07      | 0.15    | 0.06    | 0.04    | 0.09    | 0.86    | 0.13    | 0.61       | 0.33    | 0.39    | 0.20    | 0.47    |
| BDE 49      | r       | 0.76    | 0.73      | 0.29   | 1.00    | 0.76    | 0.77    | 0.70    | 0.70    | 0.68      | 0.61    | 0.65    | 0.50    | 0.36    | 0.09    | 0.24    | 0.13       | 0.16    | 0.14    | 0.13    | 0.16    |
|             | p-value | <0.0001 | <0.0001   | 0.04   |         | <0.0001 | <0.0001 | <0.0001 | <0.0001 | <0.0001   | <0.0001 | <0.0001 | 0.0002  | 0.009   | 0.52    | 0.10    | 0.38       | 0.27    | 0.33    | 0.38    | 0.27    |
| BDE 47      | r       | 0.85    | 0.86      | 0.38   | 0.76    | 1.00    | 0.91    | 0.93    | 0.93    | 0.89      | 0.80    | 0.87    | 0.63    | 0.46    | 0.17    | 0.29    | 0.00       | 0.06    | 0.09    | 0.04    | 0.01    |
|             | p-value | <0.0001 | <0.0001   | 0.006  | <0.0001 |         | <0.0001 | <0.0001 | <0.0001 | <0.0001   | <0.0001 | <0.0001 | <0.0001 | 0.0009  | 0.24    | 0.04    | 1.00       | 0.67    | 0.52    | 0.76    | 0.93    |
| BDE 66      | r       | 0.79    | 0.81      | 0.36   | 0.77    | 0.91    | 1.00    | 0.87    | 0.87    | 0.84      | 0.74    | 0.80    | 0.57    | 0.46    | 0.18    | 0.33    | 0.01       | 0.14    | 0.17    | 0.11    | 0.09    |
|             | p-value | <0.0001 | <0.0001   | 0.01   | <0.0001 | <0.0001 |         | <0.0001 | <0.0001 | <0.0001   | <0.0001 | <0.0001 | <0.0001 | 0.0007  | 0.22    | 0.02    | 0.96       | 0.35    | 0.24    | 0.45    | 0.55    |
| BDE 99      | r       | 0.76    | 0.73      | 0.27   | 0.70    | 0.93    | 0.87    | 1.00    | 0.96    | 0.96      | 0.86    | 0.95    | 0.72    | 0.43    | 0.23    | 0.26    | 0.01       | 0.17    | 0.17    | 0.10    | 0.08    |
|             | p-value | <0.0001 | <0.0001   | 0.06   | <0.0001 | <0.0001 | <0.0001 |         | <0.0001 | <0.0001   | <0.0001 | <0.0001 | <0.0001 | 0.002   | 0.11    | 0.06    | 0.95       | 0.25    | 0.23    | 0.49    | 0.56    |
| BDE 100     | r       | 0.75    | 0.76      | 0.24   | 0.70    | 0.93    | 0.87    | 0.96    | 1.00    | 0.96      | 0.93    | 0.94    | 0.73    | 0.48    | 0.28    | 0.30    | 0.02       | 0.18    | 0.20    | 0.12    | 0.11    |
|             | p-value | <0.0001 | <0.0001   | 0.09   | <0.0001 | <0.0001 | <0.0001 | <0.0001 |         | <0.0001   | <0.0001 | <0.0001 | <0.0001 | 0.0005  | 0.05    | 0.04    | 0.90       | 0.20    | 0.16    | 0.40    | 0.46    |
| BDE 85/155  | r       | 0.70    | 0.68      | 0.26   | 0.68    | 0.89    | 0.84    | 0.96    | 0.96    | 1.00      | 0.92    | 0.98    | 0.75    | 0.50    | 0.26    | 0.32    | 0.00       | 0.22    | 0.23    | 0.14    | 0.11    |
|             | p-value | <0.0001 | <0.0001   | 0.07   | <0.0001 | <0.0001 | <0.0001 | <0.0001 | <0.0001 |           | <0.0001 | <0.0001 | <0.0001 | 0.0002  | 0.07    | 0.02    | 0.98       | 0.13    | 0.11    | 0.34    | 0.43    |
| BDE 154     | r       | 0.63    | 0.65      | 0.21   | 0.61    | 0.80    | 0.74    | 0.86    | 0.93    | 0.92      | 1.00    | 0.92    | 0.70    | 0.54    | 0.36    | 0.38    | 0.04       | 0.29    | 0.30    | 0.23    | 0.22    |
|             | p-value | <0.0001 | <0.0001   | 0.15   | <0.0001 | <0.0001 | <0.0001 | <0.0001 | <0.0001 | <0.0001   |         | <0.0001 | <0.0001 | <0.0001 | 0.01    | 0.006   | 0.77       | 0.04    | 0.03    | 0.12    | 0.12    |
| BDE 153     | r       | 0.65    | 0.64      | 0.27   | 0.65    | 0.87    | 0.80    | 0.95    | 0.94    | 0.98      | 0.92    | 1.00    | 0.72    | 0.54    | 0.30    | 0.38    | 0.01       | 0.26    | 0.27    | 0.18    | 0.15    |
|             | p-value | <0.0001 | <0.0001   | 0.06   | <0.0001 | <0.0001 | <0.0001 | <0.0001 | <0.0001 | <0.0001   | <0.0001 |         | <0.0001 | <0.0001 | 0.03    | 0.006   | 0.95       | 0.07    | 0.05    | 0.20    | 0.29    |
| BDE 138     | r       | 0.51    | 0.50      | 0.29   | 0.50    | 0.63    | 0.57    | 0.72    | 0.73    | 0.75      | 0.70    | 0.72    | 1.00    | 0.16    | 0.09    | 0.00    | -0.10      | 0.12    | 0.07    | 0.05    | 0.19    |
|             | p-value | 0.0002  | 0.0002    | 0.04   | 0.0002  | <0.0001 | <0.0001 | <0.0001 | <0.0001 | <0.0001   | <0.0001 | <0.0001 |         | 0.27    | 0.51    | 0.99    | 0.47       | 0.40    | 0.61    | 0.73    | 0.19    |
| BDE 183     | r       | 0.28    | 0.32      | 0.25   | 0.36    | 0.46    | 0.46    | 0.43    | 0.48    | 0.50      | 0.54    | 0.54    | 0.16    | 1.00    | 0.32    | 0.88    | 0.28       | 0.23    | 0.36    | 0.24    | 0.13    |
|             | p-value | 0.05    | 0.02      | 0.09   | 0.009   | 0.0009  | 0.0007  | 0.002   | 0.0005  | 0.0002    | <0.0001 | <0.0001 | 0.27    |         | 0.02    | <0.0001 | 0.05       | 0.11    | 0.01    | 0.09    | 0.36    |
| BDE 202     | r       | 0.06    | 0.00      | 0.03   | 0.09    | 0.17    | 0.18    | 0.23    | 0.28    | 0.26      | 0.36    | 0.30    | 0.09    | 0.32    | 1.00    | 0.48    | 0.37       | 0.77    | 0.80    | 0.70    | 0.61    |
|             | p-value | 0.70    | 1.00      | 0.86   | 0.52    | 0.24    | 0.22    | 0.11    | 0.05    | 0.07      | 0.01    | 0.03    | 0.51    | 0.02    |         | 0.0004  | 0.008      | <0.0001 | <0.0001 | <0.0001 | <0.0001 |
| BDE 201     | r       | 0.14    | 0.16      | 0.22   | 0.24    | 0.29    | 0.33    | 0.26    | 0.30    | 0.32      | 0.38    | 0.38    | 0.00    | 0.88    | 0.48    | 1.00    | 0.38       | 0.41    | 0.55    | 0.44    | 0.30    |
|             | p-value | 0.35    | 0.27      | 0.13   | 0.10    | 0.04    | 0.02    | 0.06    | 0.04    | 0.02      | 0.01    | 0.01    | 0.99    | <0.0001 | 0.0004  |         | 0.007      | 0.003   | <0.0001 | 0.002   | 0.03    |
| BDE 200/203 | r       | -0.04   | -0.16     | 0.07   | 0.13    | 0.00    | 0.01    | 0.01    | 0.02    | 0.00      | 0.04    | 0.01    | -0.10   | 0.28    | 0.37    | 0.38    | 1.00       | 0.45    | 0.49    | 0.40    | 0.43    |
|             | p-value | 0.80    | 0.28      | 0.61   | 0.38    | 1.00    | 0.96    | 0.95    | 0.90    | 0.98      | 0.77    | 0.95    | 0.47    | 0.05    | 0.008   | 0.007   |            | 0.001   | 0.0003  | 0.004   | 0.002   |
| BDE 208     | r       | -0.05   | -0.09     | -0.14  | 0.16    | 0.06    | 0.14    | 0.17    | 0.18    | 0.22      | 0.29    | 0.26    | 0.12    | 0.23    | 0.77    | 0.41    | 0.45       | 1.00    | 0.97    | 0.93    | 0.85    |
|             | p-value | 0.74    | 0.51      | 0.33   | 0.27    | 0.67    | 0.35    | 0.25    | 0.20    | 0.13      | 0.04    | 0.07    | 0.40    | 0.11    | <0.0001 | 0.003   | 0.001      |         | <0.0001 | <0.0001 | <0.0001 |
| BDE 207     | r       | -0.05   | -0.09     | -0.13  | 0.14    | 0.09    | 0.17    | 0.17    | 0.20    | 0.23      | 0.30    | 0.27    | 0.07    | 0.36    | 0.80    | 0.55    | 0.49       | 0.97    | 1.00    | 0.93    | 0.83    |
|             | p-value | 0.72    | 0.56      | 0.39   | 0.33    | 0.52    | 0.24    | 0.23    | 0.16    | 0.11      | 0.03    | 0.05    | 0.61    | 0.01    | <0.0001 | <0.0001 | 0.0003     | <0.0001 |         | <0.0001 | <0.0001 |
| BDE 206     | r       | -0.07   | -0.07     | -0.18  | 0.13    | 0.04    | 0.11    | 0.10    | 0.12    | 0.14      | 0.23    | 0.18    | 0.05    | 0.24    | 0.70    | 0.44    | 0.40       | 0.93    | 0.93    | 1.00    | 0.88    |
|             | p-value | 0.65    | 0.61      | 0.20   | 0.38    | 0.76    | 0.45    | 0.49    | 0.40    | 0.34      | 0.12    | 0.20    | 0.73    | 0.09    | <0.0001 | 0.002   | 0.004      | <0.0001 | <0.0001 |         | <0.0001 |
| BDE 209     | r       | -0.08   | -0.08     | -0.11  | 0.16    | 0.01    | 0.09    | 0.08    | 0.11    | 0.11      | 0.22    | 0.15    | 0.19    | 0.13    | 0.61    | 0.30    | 0.43       | 0.85    | 0.83    | 0.88    | 1.00    |
|             | p-value | 0.60    | 0.57      | 0.47   | 0.27    | 0.93    | 0.55    | 0.56    | 0.46    | 0.43      | 0.12    | 0.29    | 0.19    | 0.36    | <0.0001 | 0.03    | 0.002      | <0.0001 | <0.0001 | <0.0001 |         |

S2

Table S2. Spearman correlation coefficients for PBDE concentrations in serum (n = 24)

|                                                |         |         | Serum PBDE congener |         |         |         |         | Lipid adjusted serum PBDE congener |         |         |         |         |      |
|------------------------------------------------|---------|---------|---------------------|---------|---------|---------|---------|------------------------------------|---------|---------|---------|---------|------|
|                                                |         |         | BDE 28              | BDE 47  | BDE 99  | BDE 100 | BDE 153 | BDE 28                             | BDE 47  | BDE 99  | BDE 100 | BDE 153 |      |
| Serum<br>PBDE<br>congener                      | BDE 28  | r       | 1                   | 0.96    | 0.83    | 0.88    | 0.05    | 0.96                               | 0.93    | 0.80    | 0.86    | 0.06    |      |
|                                                |         | p-value |                     | <0.0001 | <0.0001 | <0.0001 | 0.83    | <0.0001                            | <0.0001 | <0.0001 | <0.0001 | 0.79    |      |
|                                                | BDE 47  | r       | 0.96                | 1       | 0.92    | 0.92    | 0.15    | 0.95                               | 0.97    | 0.90    | 0.90    | 0.16    |      |
|                                                |         | p-value | <0.0001             |         | <0.0001 | <0.0001 | 0.49    | <0.0001                            | <0.0001 | <0.0001 | <0.0001 | <0.0001 | 0.46 |
|                                                | BDE 99  | r       | 0.83                | 0.92    | 1       | 0.85    | 0.18    | 0.80                               | 0.88    | 0.97    | 0.81    | 0.19    |      |
|                                                | p-value | <0.0001 | <0.0001             |         | <0.0001 | 0.40    | <0.0001 | <0.0001                            | <0.0001 | <0.0001 | <0.0001 | 0.37    |      |
|                                                | BDE 100 | r       | 0.88                | 0.92    | 0.85    | 1       | 0.29    | 0.88                               | 0.89    | 0.83    | 0.96    | 0.32    |      |
|                                                |         | p-value | <0.0001             | <0.0001 | <0.0001 |         | 0.18    | <0.0001                            | <0.0001 | <0.0001 | <0.0001 | <0.0001 | 0.13 |
|                                                | BDE 153 | r       | 0.05                | 0.15    | 0.18    | 0.29    | 1       | 0.11                               | 0.07    | 0.13    | 0.25    | 0.98    |      |
|                                                |         | p-value | 0.83                | 0.49    | 0.40    | 0.18    |         | 0.62                               | 0.74    | 0.55    | 0.24    | <0.0001 |      |
| Lipid<br>adjusted<br>serum<br>PBDE<br>congener | BDE 28  | r       | 0.96                | 0.95    | 0.80    | 0.88    | 0.11    | 1                                  | 0.96    | 0.81    | 0.91    | 0.14    |      |
|                                                |         | p-value | <0.0001             | <0.0001 | <0.0001 | <0.0001 | 0.62    |                                    | <0.0001 | <0.0001 | <0.0001 | 0.50    |      |
|                                                | BDE 47  | r       | 0.93                | 0.97    | 0.88    | 0.89    | 0.07    | 0.96                               | 1       | 0.90    | 0.91    | 0.11    |      |
|                                                |         | p-value | <0.0001             | <0.0001 | <0.0001 | <0.0001 | 0.74    | <0.0001                            |         | <0.0001 | <0.0001 | <0.0001 | 0.62 |
|                                                | BDE 99  | r       | 0.80                | 0.90    | 0.97    | 0.83    | 0.13    | 0.81                               | 0.90    | 1       | 0.83    | 0.16    |      |
|                                                | p-value | <0.0001 | <0.0001             | <0.0001 | <0.0001 | 0.55    | <0.0001 | <0.0001                            |         | <0.0001 | <0.0001 | 0.45    |      |
|                                                | BDE 100 | r       | 0.86                | 0.90    | 0.81    | 0.96    | 0.25    | 0.91                               | 0.91    | 0.83    | 1       | 0.30    |      |
|                                                |         | p-value | <0.0001             | <0.0001 | <0.0001 | <0.0001 | 0.24    | <0.0001                            | <0.0001 | <0.0001 |         | <0.0001 | 0.16 |
|                                                | BDE 153 | r       | 0.06                | 0.16    | 0.19    | 0.32    | 0.98    | 0.14                               | 0.11    | 0.16    | 0.30    | 1       |      |
|                                                |         | p-value | 0.79                | 0.46    | 0.37    | 0.13    | <0.0001 | 0.50                               | 0.62    | 0.45    | 0.16    |         |      |

S3

Table S3. Spearman correlation coefficients for PBDE concentrations in lipid adjusted serum of males and females (n = 12 couples)

|         |         | Males   |         |         |         |         |       |
|---------|---------|---------|---------|---------|---------|---------|-------|
|         |         | BDE 28  | BDE 47  | BDE 99  | BDE 100 | BDE 153 |       |
| Females | BDE 28  | r       | 0.93    | 0.90    | 0.92    | 0.76    | 0.07  |
|         |         | p-value | <0.0001 | <0.0001 | <0.0001 | 0.004   | 0.83  |
|         | BDE 47  | r       | 0.81    | 0.81    | 0.83    | 0.64    | -0.06 |
|         |         | p-value | 0.001   | 0.001   | 0.0008  | 0.02    | 0.86  |
|         | BDE 99  | r       | 0.54    | 0.65    | 0.70    | 0.44    | -0.08 |
|         |         | p-value | 0.07    | 0.02    | 0.01    | 0.15    | 0.81  |
|         | BDE 100 | r       | 0.76    | 0.75    | 0.76    | 0.63    | 0.08  |
|         |         | p-value | 0.004   | 0.005   | 0.004   | 0.03    | 0.80  |
|         | BDE 153 | r       | 0.10    | 0.14    | 0.09    | 0.33    | 0.40  |
|         |         | p-value | 0.76    | 0.66    | 0.78    | 0.29    | 0.19  |
